1 **Complete genomic characterisation of two *Escherichia coli* lineages**  
2 **responsible for a cluster of carbapenem resistant infections in a Chinese**  
3 **hospital**

4

5 Zhiyong Zong<sup>1</sup>, Samuel Fenn<sup>2</sup>, Christopher Connor<sup>2</sup>, Yu Feng<sup>1</sup>, Alan McNally<sup>2\*</sup>

6 <sup>1</sup>Centre for Infectious Diseases, West China Hospital of Sichuan University,  
7 Chengdu, China

8 <sup>2</sup>Institute of Microbiology and Infection, College of Medical and Dental Science,  
9 University of Birmingham, Birmingham B15 2TT

10

11 \*Corresponding author: Dr Alan McNally, Institute of Microbiology and Infection,  
12 College of Medical and Dental Science, University of Birmingham, Birmingham B15  
13 2TT. 0044 121 4158433. a.mcnally.1@bham.ac.uk

14

15 Running title: Carbapenem resistant clones of *E. coli*

16

## 17    **Abstract**

18    The increase in infections as a result of multi-drug resistant strains of *Escherichia*  
19    *coli* is a global health crisis. The emergence of globally disseminated lineages of *E.*  
20    *coli* carrying ESBL genes has been well characterised. An increase in strains  
21    producing carbapenemase enzymes and mobile colistin resistance is now being  
22    reported, but to date there is little genomic characterisation of such strains. Routine  
23    screening of patients within an ICU of West China Hospital identified a number of *E.*  
24    *coli* carrying the *bla*<sub>NDM-5</sub> carbapenemase gene, found to be two distinct clones, *E.*  
25    *coli* ST167 and ST617. Interrogation of publically available data shows isolation of  
26    ESBL and carbapenem resistant strains of both lineages from clinical cases across  
27    the world. Further analysis of a large collection of publically available genomes  
28    shows that ST167 and ST617 have emerged in distinct patterns from the ST10  
29    clonal complex of *E. coli*, but share evolutionary events involving switches in LPS  
30    genetics, intergenic regions and anaerobic metabolism loci. These may be  
31    evolutionary events which underpin the emergence of carbapenem resistance  
32    plasmid carriage in *E. coli*.

33

## 34     **Background**

35     Infections from multi-drug resistant (MDR) *Escherichia coli* are a significant global  
36     health care threat[1]. Despite being an extremely diverse species, MDR in *E. coli* is  
37     largely confined to strains capable of causing extra-intestinal infections (ExPEC)  
38     such as urinary tract infections (UTI) and bacteraemia[1–4]. As many as 50% of *E.*  
39     *coli* strains isolated from UTI and bacteraemia cases may exhibit resistance to three  
40     or more classes of antibiotic, termed MDR. This resistance is primarily driven by the  
41     acquisition of large plasmids containing multiple resistance genes[2]. The rapid  
42     global dissemination of MDR *E. coli* is associated with carriage of plasmids  
43     containing genes encoding extended-spectrum  $\beta$ -lactamases (ESBL) which confer  
44     resistance to third-generation cephalosporins[5]. The carriage of MDR plasmids  
45     containing ESBL genes renders *E. coli* susceptible only to the carbapenem class of  
46     antibiotics and the antimicrobial compound colistin[5]. However strains of *E. coli* are  
47     now being reported with plasmids containing  $\beta$ -lactamases conferring resistance to  
48     carbapenems (carbapenemases) and the *mcr-1* colistin resistance gene [6–9].

49     The global dissemination of ESBL *E. coli* is attributable to the rapid dispersal of a  
50     small number of *E. coli* lineages. The most dominant of these is the ST131 lineage  
51     which is predominantly associated with carriage of the *bla*<sub>CTX-M-15</sub> ESBL gene[2].  
52     ST131 is an ExPEC lineage and the most common cause of UTI and bacteraemia in  
53     the developed world[2]. Other dominant lineages of ESBL *E. coli* are ST73, ST95,  
54     and ST648 which are also ExPEC[3,4]. ESBL carriage can also be found transiently  
55     in strains belonging the ST10 clonal complex of *E. coli*[3]. ST10 complex strains are  
56     host generalist *E. coli* which are frequently found as intestinal commensal inhabitants  
57     of mammals and avian species[10], and are devoid of the virulence-associated  
58     genes known to be required for pathogenesis[11]. Our knowledge of the genomic

landscape of carbenemase production in *E. coli* is far less developed, with the vast majority of reports being genomes of individual clinical isolates sporadically distributed across the globe. Just one significant publication exists reporting a specifically designed genomic analysis of a temporal collection of carbapenem resistant *E. coli* which showed very wide dissemination of carbapenem resistance across species and within-species lineages of the enterobacteriaceae [12].

Here we report the isolation of *E. coli* containing the carbapenem-resistance gene *bla*<sub>NDM-5</sub> in an ICU ward in West China Hospital, Chengdu. The isolates do not belong to one of the dominant MDR lineages of ExPEC, but to ST167 and ST617, both members of the ST10 clonal complex. Genomic data supports the long-term presence of these bacteria in the ICU with repeated dissemination from a central reservoir. Contextualisation of the Chinese strains with a collection of publically available genomes shows isolation of MDR ST167 and ST617 strains from clinical episodes across the world, and in the case of ST167 frequent occurrence of carriage of both ESBL and carbapenemase genes. By comparing these lineages to a large number of publically available ST10 genomes we identify potentially significant events in their evolutionary trajectories, including mutations in the LPS biosynthesis locus which truncate LPS. We also find evidence of compensatory mutations in intergenic regions as found in *E. coli* ST131 as well as mutations in anaerobic metabolism loci. Our findings support the need for a more concerted global surveillance effort focussing on identifying frequently occurring lineages of carbapenem resistant *E. coli*.

## Methods

### Bacterial isolation and characterisation

Strain 0215 was recovered from a rectal swab of a 75-year-old male patient on September 2013 in a 50-bed medical ICU at West China Hospital, Chengdu, during routine screening that is performed as standard in the ICU on all new admissions. Following the identification of *bla*<sub>NDM-5</sub>, we performed an active screening project on adult patients (age ≥16) at the medical ICU ward during a 7-month period from May to November 2014. This study was conducted in accordance with the amended Declaration of Helsinki and was approved, under a waiver of consent, by the Ethics Committee of West China Hospital. Rectal swabs were collected from patients within 2 days of admission to the ICU and within the 3 days prior to ICU discharge for those patients with a length of stay of 3 days or more. Swabs were transferred to the laboratory in transport media and were screened for carbapenem-resistant Enterobacteriaceae using the CHROMAgar Orientation agar plates containing 2 µg/ml meropenem. Carbapenem-resistant *E. coli* were recovered from the rectal swabs of 8 different patients (Table 1). Furthermore, one of the 8 patients developed bacteraemia during his ICU stay and an *E. coli* was recovered from his blood and included in the study. During the study period, two additional *E. coli* clinical isolates carrying *bla*<sub>NDM-5</sub> were recovered in the hospital, from two patients on admission.

# **Genome sequencing**

The ST167 and ST617 strains isolated in Chengdu were cultured in LB broth at 37°C overnight. DNA was extracted using QIAamp® DNA Mini Kit (QIAGEN) and 150 bp paired-end libraries of each strain prepared and sequenced using the Illumina HiSeq X-Ten platform (raw data accession numbers Table S1 and S2). Genomes were assembled using SPAdes[13] and annotated using Prokka[14]. The MLST sequence type of the strains was determined using the in silico prediction tool MLSTFinder[15]. The *E. coli* genome database Enterobase ([www.enterobase.warwick.ac.uk](http://www.enterobase.warwick.ac.uk)) was

interrogated on 1<sup>st</sup> December 2016 and all available ST167 and ST617 genomes were downloaded (Table S1 and S2) and annotated using Prokka. A further 256 ST10 genomes were selected to represent the geographical, temporal, and source attribution diversity present in the database (Table S3) and were downloaded and annotated using Prokka. To select these genomes a phylogenetic tree was inferred from the assembled genome of every ST10 on Enterobase using Parsnp[16]. From this phylogeny 500 genomes were chosen to span the entire phylogenetic diversity, and then the final selection made to represent the full ST10 diversity as described. The antibiotic resistance gene profile of all isolates was determined using Abricate (<https://github.com/tseemann/abricate>).

### High-resolution SNP analysis

We created a closed genome sequence for a Chinese ST167 strain 1237 by combining our Illumina sequence data with data generated on the Minlon sequencer. Raw Minlon reads were converted into fastQ format (accession number PRJNA422975) using Poretools [17] and assembled using Canu [18], resulting in a single contig chromosome and four distinct single contig plasmids. The raw illumina data was then used to polish the genome assembly via five iterative rounds of polishing with Pilon [19]. The ST167 and ST617 genomes from Chengdu were analysed by mapping raw reads against the hybrid assembled ST167 genome. Mapping was performed using Snippy (<https://github.com/tseemann/snippy>) and the resulting SNP profiles were used to create a consensus sequence for each genome which was aligned using the parsnp alignment tool in Harvest[16]. Analysis of the plasmid containing the *bla*<sub>NDM-5</sub> gene revealed that it was a 47-kb IncX3 plasmid and there were no antibiotic resistant genes other than *bla*<sub>NDM-5</sub> located on the plasmid.

Specific mapping of the raw Illumina data against the pNDM5 plasmid was performed for all strains as described above.

### **Phylogenetic analysis**

Pan-genomes were constructed for the ST167, ST617, ST10, and combined datasets using Roary[20] with the --e --mafft setting to create a concatenated alignment of core CDS. The alignments were used to infer ST167, ST617, ST10, and combined phylogenies using RaxML[21] with the GTR-Gamma model of site heterogeneity and 100 bootstrap iterations. Carriage of ESBL and carbapenemase genes was annotated on the trees using Phandango (<https://jameshadfield.github.io/phandango/>), and geographical source was annotated using iTOL[22].

### **Detection of lineage specific genetic traits**

Microbial GWAS was performed using two approaches. First the combined data set pan-genome matrix was used as input for Scoary [23] searching for loci unique to ST167, ST617, and both ST167 and ST617 versus ST10. In parallel we also used SEER [24] to detect kmers significantly associated with ST167, ST617, or both combined versus ST10. The results of both approaches were combined to identify coding loci associated with the emergence of ST167 and ST617. In silico serotyping was performed using two independent methods, SRST2 and SerotypeFinder [25,26]. Both methods utilise WGS data to specific O and H antigens to strains. Intergenic regions (IGRs) were investigated using Piggy [27] to search for IGRs which had switched [28] in ST617, ST167, or both compared to ST10. This data was combined with SEER data to identify high-confidence IGR switches associated with the emergence of ST167 and ST617.

### **Results**

# **Presence of *E. coli* ST167 and ST617 strains containing the NDM-5 carbapenemase resistance gene in an ICU ward in West China Hospital.**

A total of ten isolates of *E. coli* containing *bla*<sub>NDM-5</sub> were obtained during the investigation. Nine of these isolates belonged to sequence types ST167/617 (Table 1), which are members of the ST10 complex of *E. coli* most commonly associated with mammalian intestinal commensal carriage. Three ST167 isolates (0215, 243 and 25) were obtained from swabs or clinical samples collected on admission to hospital, suggesting that they were introduced from external sources. The three patients were all citizens of Chengdu city but they were admitted to different local hospitals before transferring to West China hospital. The remaining ST167 isolates were recovered from swabs or samples collected at least 3 days after admission to the ICU of West China hospital, suggesting that they were acquired during their ICU stay. ST167 *E. coli* carrying *bla*<sub>NDM-5</sub> caused infections (bacteremia and abdominal infection) in only two patients but colonised the others. Both ST617 *E. coli* carrying *bla*<sub>NDM-5</sub> only colonised patients. All patients colonised or infected with *E. coli* carrying *bla*<sub>NDM-5</sub> of ST167 or ST617 had received carbapenems before the recovery of the isolates.

## **SNP analysis suggests continued dissemination of strains from a central reservoir and sharing of resistance plasmid between lineages.**

To determine the level of relatedness between all isolated strains we mapped reads of all the strains against a closed ST167 strain (strain 1237) generated by a combination of Illumina and Minlon sequence data. The resulting high-resolution SNP alignment showed the distance between the ST167 and ST617 strains to be over 25,000 SNPs, confirming they are distinct lineages, with the two ST617 isolates separated by just 7 SNPs. Deeper analysis of the ST167 cluster of strains showed



diversity ranging from 5 to 799 SNPs (Fig 1). Strains 936 and 1222 (both carriage isolates) are the most closely related isolates with just 5 SNPs difference between them, with both strains being acquired by patients in the ICU within one month of each other. However these strains are 73 SNPs different from a strain isolated the exact same month on the ICU from a strain (1237) that was acquired in the ICU. This is almost double the genetic distance (46 SNPs) from a strain acquired (442 and 57, isolated from the same patient) in the ICU two months earlier. These distances are also larger than those for any isolate to the first two strains brought into the ICU, strain 0215 and strain 243, which differ from all other isolates by around 30 SNPs, and from each other by 15 SNPs. Such an observation suggests a potential combination of patient-to-patient transmission in the affected ICU [29], along with the continued dissemination of the strain from a central reservoir where there is an accumulation of diversity [29,30]. Genomic analysis also allows us to identify a second introgression of an ST167 strain (25) from the community, which is over 700 SNPs different from the other isolates. Mapping of the raw sequence data against the 43kb IncX3 plasmid containing *bla<sub>NDM-5</sub>* also confirmed that the plasmid present in the ST617 strains was identical to that in all of the ST167 strains with just two detectable SNPs difference across the isolates.

# **MDR ST167 and ST617 *E. coli* have been isolated across the world.**

We sought to contextualise the wider relevance of our Chengdu isolates by investigating the wider prevalence of ST167 and ST617 strains. We searched the Enterobase *E. coli* database and recovered a total of 87 genomes of ST167 (table S1) and 86 genomes of ST617 (table S2), isolated from across the world. A core CDS-based phylogeny of both lineages showed a diverse set of genomes with around 17,000 SNPs in ST167 and around 15,000 SNPs in ST617. Annotation of the

ST617 phylogeny with  $\beta$ -lactamase gene carriage shows a high prevalence of the *bla*<sub>CTX-M-15</sub> ESBL gene in characterised isolates (Fig 2A). Annotation of the ST167 phylogeny with  $\beta$ -lactamase gene carriage (Fig 2B) shows a pattern of resistance gene carriage, with multiple independent acquisitions of carbapenemase across the phylogeny including *bla*<sub>NDM-1</sub>, *bla*<sub>NDM-5</sub>, *bla*<sub>NDM-7</sub>, *bla*<sub>OXA-181</sub>, and *bla*<sub>KPC-3</sub>. For both phylogenies there is clear evidence of isolation of strains from across the globe.

### **Evolutionary genomic analysis correlates switches in LPS gene content with the emergence of the ST167/ST617 lineage**

Both ST167 and ST617 are single locus variants of the ST10 lineage of *E. coli*. ST10 is the most abundant lineage of *E. coli* represented in the Enterobase database and contains isolates ranging from drug susceptible environmental and human commensal strains, to multi-drug resistant strains isolated from human clinical UTI and bacteraemia infections. We selected 256 ST10 genomes from Enterobase (Table S3) to represent the known spectrum of ST10 diversity present in the database, and merged this data set with our publically available ST167/ST617 genome data set to create a larger ST10 complex phylogeny (Fig 3). The resulting phylogeny shows that ST167 and ST617 are sister clades with respect to ST10, with ST617 emerging as a nested clade from a single outlying ST167 genome, though the distance between ST167 and ST617 is around 18,000 SNPs.

Given the phylogenetic pattern of ST167 and ST617 with respect to ST10, we sought to determine if their emergence from ST10 is associated with defined evolutionary events. We used a combined GWAS approach to compare the ST167/617 genomes with ST10, using both SEER and SCOARY analysis of a pangenome matrix. Only loci considered to be significantly associated with one lineage over the other by both methods were further investigated (Dataset S1). Most striking was the absence of

the *wzzB* gene and *wca* biosynthetic cluster in ST167/ST617 whilst the majority of the ST10 genomes contained both (Figure 4). These genes are involved in LPS biosynthesis with *wzzB* being the master controller of O antigen chain length in the *wzx/wzy* pathway, whilst *wca* genes are responsible for colonic acid biosynthesis [31]. In silico *E. coli* serotyping [32] established that ST167 and ST617 demonstrate the exact same O antigenic type (O32novel) with similarity also seen in H antigen type (H9 or H10) (Figure 3), whilst the SerotypeFinder database identified the strains as O89.

Our combined GWAS analysis also identified another ~90 CDS which were present across the entire data set, but which had distinct alleles in the ST167/ST617 genomes compared to those in ST10 (Figure 5, Dataset S2). Many of these CDS encode dehydrogenase enzymes involved in anaerobic metabolism, or are part of the *cob/pdu/eut* operons known to be involved in anaerobic respiration during intestinal inflammation [33]. This would appear to suggest differential evolutionary events in key genes involved in anaerobic metabolism in the formation of the ST167/ST617 lineage. Also present were unique alleles in core CDS involved in acid and bile salt tolerance, and a number of fimbrial-like proteins. In conjunction these data would suggest differential evolutionary forces acting on loci involved in mammalian colonisation in ST167/617 in comparison to ST10. Furthermore a combined SEER and Piggy approach identified unique sequences in 17 intergenic regions (IGRs) upstream of core CDS in ST167/617 that were distinct from ST10, including IGRs upstream of anaerobic metabolic loci also present in the SEER/SCOARY analysis (Dataset S1).

## Discussion

Our data presented here provide a comprehensive genomic analysis of two lineages of carbapenem resistant *E. coli* infecting multiple patients within the ICU of West China hospital. Both these lineages, ST167 and ST617, are members of the larger ST10 complex of *E. coli*, which is ubiquitously found in environmental, human clinical, and mammalian intestinal commensal sampling. Our analysis is the first genome level characterisation of strains belonging to ST167 or ST617, despite a number of single site reports of clinical infections with both lineages existing in the literature. From a public health perspective our genomic characterisation of the ST167 and ST617 strains isolated from the ICU provide insight into the dynamics of carbapenem resistant *E. coli* infection. Our genomic epidemiology analysis of the ST167 strains suggests a scenario whereby a strain circulating in the Chengdu area enters the hospital setting and establishes a reservoir in the hospital environment, leading to continued episodes of acquisition and infection from a central source where diversity is accumulating [30]. This is also supported by the observation of ST617 being introduced into the ICU by a patient followed by acquisition in the ICU a month later by a strain just 7 SNPs different.

Our analysis also shows that the diversity which accumulates in the genome of the ST167 isolates during the course of the investigation is not mirrored by diversity in the plasmid carrying the *bla*<sub>NDM-5</sub> gene. Only 1 SNP difference existed between the sequence of this plasmid in the ST167 isolates, and only 2 SNPs difference between the ST167 and ST617 isolates. As a result it is impossible to tell if the IncX3 plasmid associated with dissemination of *bla*<sub>NDM-5</sub> in China [34] was transferred between ST167 and ST617 in the hospital, or if the plasmid is highly stable with only deleterious mutations occurring and quickly purged from the population. Clearly there is a need for more thorough and detailed analysis of various resistance

281 plasmids within and between hospitals, such as was done recently for NDM-1  
282 plasmids in Latin America [35].

283 The lack of appropriately designed isolate collection and sequencing strategy means  
284 it is impossible to conduct any form of genomic epidemiological analyses of these *E.*  
285 *coli* lineages beyond our Chinese investigation. However the ready availability of a  
286 large number of good-quality, curated genome assemblies in the Enterobase  
287 genome database do allow us to delve deeper into the evolutionary history of *E. coli*  
288 ST167 and ST617. Whilst data generated and uploaded to Enterobase is prone to a  
289 bias towards clinical MDR strains, it is still clear that ESBL and carbapenem resistant  
290 strains of both these lineages have been isolated from across the world over the past  
291 20 or so years (Tables S1 and S2). Phylogenetic analysis of almost 200 publically  
292 available genome sequences, contextualised by an equal number of ST10 genomes  
293 allows us to determine that ST617 shares a common ancestor with ST167 distinct  
294 from ST10.

295 Comparative genomic analysis and GWAS for traits specific to ST167 and ST617  
296 compared to ST10 also support emergence along a shared evolutionary branch. Key  
297 among these is the complete loss of the *wca* operon encoding colanic acid  
298 biosynthesis in the LPS biosynthesis pathway. The majority of *E. coli* produce their  
299 LPS utilising the O-unit translocation pathway encoded for by *wzx* and *wzy*[31]. This  
300 method utilises glycosyltransferases to assemble the O antigen in units at the  
301 cytoplasmic membrane. These units are then translocated by Wzx and polymerized  
302 by Wzy until the O antigen chain length is reached. This mechanism is utilised by the  
303 majority of the ST10 isolates, however genomic analysis shows that ST167 and  
304 ST617 utilise an alternative *wzm/wzt* ATP transporter pathway. This biosynthetic  
305 pathway assembles the entire O-antigen on the cytoplasmic face before Wzt

transports the O-chain across [31], resulting in an O-antigen with truncated chain length. O-antigen chain length plays a major role in pathogenicity of Gram negative organisms, and it has been demonstrated that loss of long O-antigen chains in *Salmonella* optimizes immune evasion and allows successful colonisation [36].

Alongside the LPS genetic changes, we also observed unique alleles of anaerobic metabolism genes and genes potentially involved in host colonisation in ST167/617 compared to ST10. Recent modelling data has shown that any factor influencing the ability of a bacterium to colonise a host will also influence its likelihood of evolving antimicrobial resistance [37].

## Conclusions

We provide data for the first ever, single hospital genomic analysis of clinical isolates of carbapenem resistant *E. coli* belonging to the ST167/617 lineage. Our data presented here provide evidence for evolutionary events that would affect microbial interaction with a mammalian host underpinning the emergence of the ST167/617 lineage from ST10. There is also evidence for lineage specific alterations in intergenic regions in ST167/617, a phenomenon which has already been described as underpinning the emergence of MDR plasmid-containing *E. coli* ST131 strains [28]. Clearly there is now a need for a fully designed genomic epidemiological investigation of lineages of *E. coli* associated with carriage of carbapenem resistance plasmids arising from the ST10 clade. Such a study will fully inform us of any potential parallelism in the evolution of MDR lineages of *E. coli*, and of the true nature and scope of their prevalence and global dissemination.

## Declarations

Ethics approval: Not applicable

Consent for publication: Not applicable

Availability of data: All raw sequence data used in this study is deposited in the ENA or SRA, with full accession numbers available in tables S1, S2 and S3. The fastq data for our Minlon assembled genome is available at PRJNA422975.

Competing interests: Not applicable

Funding: This work was funded by a Royal Society Newton Advanced Fellowship project (NA150363) and a grant from the National Natural Science Foundation of China (project no. 8151101182) awarded to ZZ and AM. SF was funded by the Wellcome Antimicrobial Resistance doctoral training project at UoB, and CC by the Wellcome MIDAS doctoral training program at UoB.

Authors contributions: Study conceived by ZZ and AM. Data generated by ZZ and YF. Data analysed by ZZ, SF, CC, YF, and AM. Paper written by ZZ and AM. All authors edited and approved the final manuscript.

## References

1. de Kraker MEA, Jarlier V, Monen JCM, Heuer OE, van de Sande N, Grundmann H. The changing epidemiology of bacteraemias in Europe: trends from the European Antimicrobial Resistance Surveillance System. Clin. Microbiol. Infect. 2013;19:860–8.
2. Mathers AJ, Peirano G, Pitout JDD. The role of epidemic resistance plasmids and international high-risk clones in the spread of multidrug-resistant Enterobacteriaceae. Clin. Microbiol. Rev. 2015;28:565–91.
3. Alhashash F, Weston V, Diggle M, McNally A. Multidrug-Resistant *Escherichia coli* Bacteremia. Emerg. Infect. Dis. 2013;19:1699–701.
4. Croxall G, Hale J, Weston V, Manning G, Cheetham P, Achtman M, et al. Molecular epidemiology of extraintestinal pathogenic *Escherichia coli* isolates from a regional cohort of elderly patients highlights the prevalence of ST131 strains with increased antimicrobial resistance in both community and hospital care settings. J. Antimicrob. Chemother. 2011;66:2501–8.
5. Livermore DM, Hawkey PM. CTX-M: changing the face of ESBLs in the UK. J. Antimicrob. Chemother. 2005;56:451–4.
6. Feng Y, Yang P, Xie Y, Wang X, McNally A, Zong Z. *Escherichia coli* of sequence type 3835 carrying blaNDM-1, blaCTX-M-15, blaCMY-42 and blaSHV-12. Sci. Rep. 2015;5:12275.
7. Zhang L, Xue W, Meng D. First report of New Delhi metallo-beta-lactamase 5 (NDM-5)-producing *Escherichia coli* from blood cultures of three leukemia patients. Int. J. Infect. Dis. 2016;42:45–6.
8. Cuzon G, Bonnin RA, Nordmann P. First identification of novel NDM carbapenemase, NDM-7, in *Escherichia coli* in France. PLoS One. 2013;8:e61322.



369 9. Zheng B, Dong H, Xu H, Lv J, Zhang J, Jiang X, et al. Coexistence of MCR-1 and  
370 NDM-1 in Clinical *Escherichia coli* Isolates. Clin. Infect. Dis. 2016;1393–5.

371 10. Leflon-Guibout V, Blanco J, Amaqdouf K, Mora A, Guize L, Nicolas-Chanoine M-  
372 H. Absence of CTX-M Enzymes but High Prevalence of Clones, Including Clone  
373 ST131, among Fecal *Escherichia coli* Isolates from Healthy Subjects Living in the  
374 Area of Paris, France. J. Clin. Microbiol. 2008;46:3900–5.

375 11. Kohler C-D, Dobrindt U. What defines extraintestinal pathogenic *Escherichia*  
376 *coli*? Int. J. Med. Microbiol. 2011;301:642–7.

377 12. Cerqueira GC, Earl AM, Ernst CM, Grad YH, Dekker JP, Feldgarden M, et al.  
378 Multi-institute analysis of carbapenem resistance reveals remarkable diversity,  
379 unexplained mechanisms, and limited clonal outbreaks. Proc. Natl. Acad. Sci.  
380 2017;114:1135–40.

381 13. Bankevich A, Nurk S, Antipov D, Gurevich AA, Dvorkin M, Kulikov AS, et al.  
382 SPAdes: a new genome assembly algorithm and its applications to single-cell  
383 sequencing. J. Comput. Biol. 2012;19:455–77.

384 14. Seemann T. Prokka: rapid prokaryotic genome annotation. Bioinformatics.  
385 2014;30:2068–9.

386 15. Larsen M V, Cosentino S, Rasmussen S, Friis C, Hasman H, Marvig RL, et al.  
387 Multilocus sequence typing of total-genome-sequenced bacteria. J. Clin. Microbiol.  
388 United States; 2012;50:1355–61.

389 16. Treangen TJ, Ondov BD, Koren S, Phillippy AM. The Harvest suite for rapid  
390 core-genome alignment and visualization of thousands of intraspecific microbial  
391 genomes. Genome Biol. 2014;15:524.

392 17. Loman NJ, Quinlan AR. Poretools: a toolkit for analyzing nanopore sequence  
393 data. Bioinformatics. 2014;30:3399–401.

- 394 18. Koren S, Walenz BP, Berlin K, Miller JR, Bergman NH, Phillippy AM. Canu:  
395 scalable and accurate long-read assembly via adaptive k-mer weighting and repeat  
396 separation. *Genome Res.* 2017;27:722–36.
- 397 19. Walker BJ, Abeel T, Shea T, Priest M, Abouelliel A, Sakthikumar S, et al. Pilon:  
398 an integrated tool for comprehensive microbial variant detection and genome  
399 assembly improvement. *PLoS One.* 2014;9:e112963.
- 400 20. Page AJ, Cummins CA, Hunt M, Wong VK, Reuter S, Holden MTG, et al. Roary:  
401 rapid large-scale prokaryote pan genome analysis. *Bioinformatics.* 2015;31:3691–3.
- 402 21. Stamatakis A Ludwig T MH. RAxML-III: a fast program for maximum likelihood-  
403 based inference of large phylogenetic trees. *Bioinformatics.* 2005;21:456.
- 404 22. Letunic I, Bork P. Interactive Tree Of Life v2: online annotation and display of  
405 phylogenetic trees made easy. *Nucleic Acids Res.* 2011;39:W475-8.
- 406 23. Brynildsrud O, Bohlin J, Scheffer L, Eldholm V. Rapid scoring of genes in  
407 microbial pan-genome-wide association studies with Scoary. *Genome Biol.*  
408 2016;17:238.
- 409 24. Lees JA, Vehkala M, Valimaki N, Harris SR, Chewapreecha C, Croucher NJ, et  
410 al. Sequence element enrichment analysis to determine the genetic basis of bacterial  
411 phenotypes. *Nat. Commun.* 2016;7:12797.
- 412 25. Inouye M, Conway TC, Zobel J, Holt KE. Short read sequence typing (SRST):  
413 multi-locus sequence types from short reads. *BMC Genomics.* 2012;13:338.
- 414 26. Joensen KG, Tetzschner AMM, Iguchi A, Aarestrup FM, Scheutz F. Rapid and  
415 Easy In Silico Serotyping of *Escherichia coli* Isolates by Use of Whole-Genome  
416 Sequencing Data. *J. Clin. Microbiol.* 2015;53:2410–26.
- 417 27. Thorpe HA, Bayliss SC, Sheppard SK, Feil EJ. Piggy: A Rapid, Large-Scale Pan-  
418 Genome Analysis Tool for Intergenic Regions in Bacteria. *bioRxiv.* 2017; Available

- 419 from: <http://biorxiv.org/content/early/2017/08/22/179515.abstract>
- 420 28. McNally A, Oren Y, Kelly D, Pascoe B, Dunn S, Sreecharan T, et al. Combined
- 421 Analysis of Variation in Core, Accessory and Regulatory Genome Regions Provides
- 422 a Super-Resolution View into the Evolution of Bacterial Populations. PLoS Genet.
- 423 2016;12:e1006280.
- 424 29. Köser CU, Holden MT, Ellington MJ, Cartwright EJ, Brown et al. Rapid whole-
- 425 genome sequencing for investigation of a neonatal MRSA outbreak. N. Engl. J. Med.
- 426 2012;366:2267–75.
- 427 30. Quick J, Cumley N, Wearn CM, Niebel M, Constantinidou C, Thomas CM, et al.
- 428 Seeking the source of *Pseudomonas aeruginosa* infections in a recently opened
- 429 hospital: an observational study using whole-genome sequencing. BMJ Open.
- 430 2014;4:e006278.
- 431 31. Iguchi A, Iyoda S, Kikuchi T, Ogura Y, Katsura K, Ohnishi M, et al. A complete
- 432 view of the genetic diversity of the *Escherichia coli* O-antigen biosynthesis gene
- 433 cluster. DNA Res. 2015;22:101–7.
- 434 32. Ingle DJ, Valcanis M, Kuzevski A, Tauschek M, Inouye M, Stinear T, et al. In
- 435 silico serotyping of *E. coli* from short read data identifies limited novel O-loci but
- 436 extensive diversity of O:H serotype combinations within and between pathogenic
- 437 lineages. Microb. genomics. 2016;2:e000064.
- 438 33. McNally A, Thomson NR, Reuter S, Wren BW. “Add, stir and reduce”: *Yersinia*
- 439 *spp.* as model bacteria for pathogen evolution. Nat. Rev. Microbiol. 2016;14:177–90.
- 440 34. Yang P, Xie Y, Feng P, Zong Z. blaNDM-5 carried by an IncX3 plasmid in
- 441 *Escherichia coli* sequence type 167. Antimicrob. Agents Chemother. 2014;58:7548–
- 442 52.
- 443 35. Marquez-Ortiz RA, Haggerty L, Olarte N, Duarte C, Garza-Ramos U, Silva-

444 Sanchez J, et al. Genomic Epidemiology of NDM-1-Encoding Plasmids in Latin  
 445 American Clinical Isolates Reveals Insights into the Evolution of Multidrug  
 446 Resistance. *Genome Biol. Evol.* 2017;9:1725–41.  
 447 36. Crawford RW, Wangdi T, Spees AM, Xavier MN, Tsois RM, Baumler AJ. Loss of  
 448 very-long O-antigen chains optimizes capsule-mediated immune evasion by  
 449 *Salmonella enterica* serovar Typhi. *MBio.* 2013;4.  
 450 37. Lehtinen S, Blanquart F, Croucher NJ, Turner P, Lipsitch M, Fraser C. Evolution  
 451 of antibiotic resistance is linked to any genetic mechanism affecting bacterial  
 452 duration of carriage. *Proc. Natl. Acad. Sci.* 2017;114:1075–80.  
 453  
 454

455 Table 1. Sources and patients of *E. coli* isolated in West China Hospital carrying *bla*<sub>NDM-5</sub>

| Isolate          | ST  | Collection date | Collection, days after admission to ICU | Source      | The host patient |        |
|------------------|-----|-----------------|-----------------------------------------|-------------|------------------|--------|
|                  |     |                 |                                         |             | Age              | Sex    |
| 0215             | 167 | 2013-09         | 0                                       | Rectal swab | 75               | Male   |
| 243              | 167 | 2014-05         | 0                                       | Rectal swab | 84               | Female |
| 442 <sup>a</sup> | 167 | 2014-07         | 7                                       | Rectal swab | 39               | Male   |
| 57 <sup>a</sup>  | 167 | 2014-07         | 16                                      | Blood       | 39               | Male   |
| 936              | 167 | 2014-09         | 12                                      | Rectal swab | 63               | Female |
| 1222             | 167 | 2014-10         | 7                                       | Rectal swab | 17               | Male   |
| 1237             | 167 | 2014-10         | 3                                       | Rectal swab | 44               | Female |
| 25               | 167 | 2014-10         | 0                                       | Ascite      | 45               | Female |
| 784              | 617 | 2014-08         | 0                                       | Rectal swab | 82               | Male   |
| 1037             | 617 | 2014-09         | 12                                      | Rectal swab | 85               | Male   |

456 <sup>a</sup>Isolates 442 and 57 were recovered from the same patient.

457

Figure 1: Maximum likelihood phylogenetic tree of *E. coli* ST167 strains isolated from the ICU of West China hospital. The phylogeny is inferred from a SNP alignment obtained by mapping raw data against a MinIon/Illumina hybrid complete assembly of isolate 1237. The annotation denotes the presence of ESBL and CPE associated  $\beta$ -lactamases as determined by Abricate.

Figure 2: Maximum likelihood phylogenetic trees of a global collection of (A) ST617 and (B) ST167 strains. The phylogeny is inferred from an alignment of concatenated core CDS sequences as determined by Roary, and is mid-point rooted. The annotation denotes the presence of ESBL and CPE associated  $\beta$ -lactamases as determined by Abricate.

Figure 3: Cladogram inferred from a maximum likelihood phylogenetic tree of ST10 strains (black branches), ST617 (red branches) and ST167 (blue branches) strains. The phylogeny is inferred from an alignment of concatenated core CDS sequences as determined by Roary, and is mid-point rooted. The outermost annotation denotes the presence of ESBL and CPE associated  $\beta$ -lactamases as determined by Abricate. The inner ring of annotation on the tree indicates O-antigen type as determined by in silico typing using srst2. The outer ring of annotation indicates H-antigen flagellar type as determined in silico using srst2.

Figure 4: Diagrammatic comparison of the region of the genome of *E. coli* MG1655 (top of diagram) and the ST167 strain 1237 (bottom of diagram) containing the *wca* colanic acid biosynthesis locus.

483 Figure 5: Manhattan skyline plot showing position of kmers identified by GWAS  
 484 analysis as being significantly associated with ST167/617 compared to ST10. The x  
 485 axis indicates the position on the WCHec1237 complete genome assembly, whilst  
 486 the Y axis indicates the numbers of statistically significant kmers mapping at that  
 487 position. Hits indicated in red are either intergenic regions (labelled IGR) identified as  
 488 being unique by both Piggy and SEER analysis, or anaerobic metabolism loci  
 489 identified as significantly different by both SEER and Scoary.

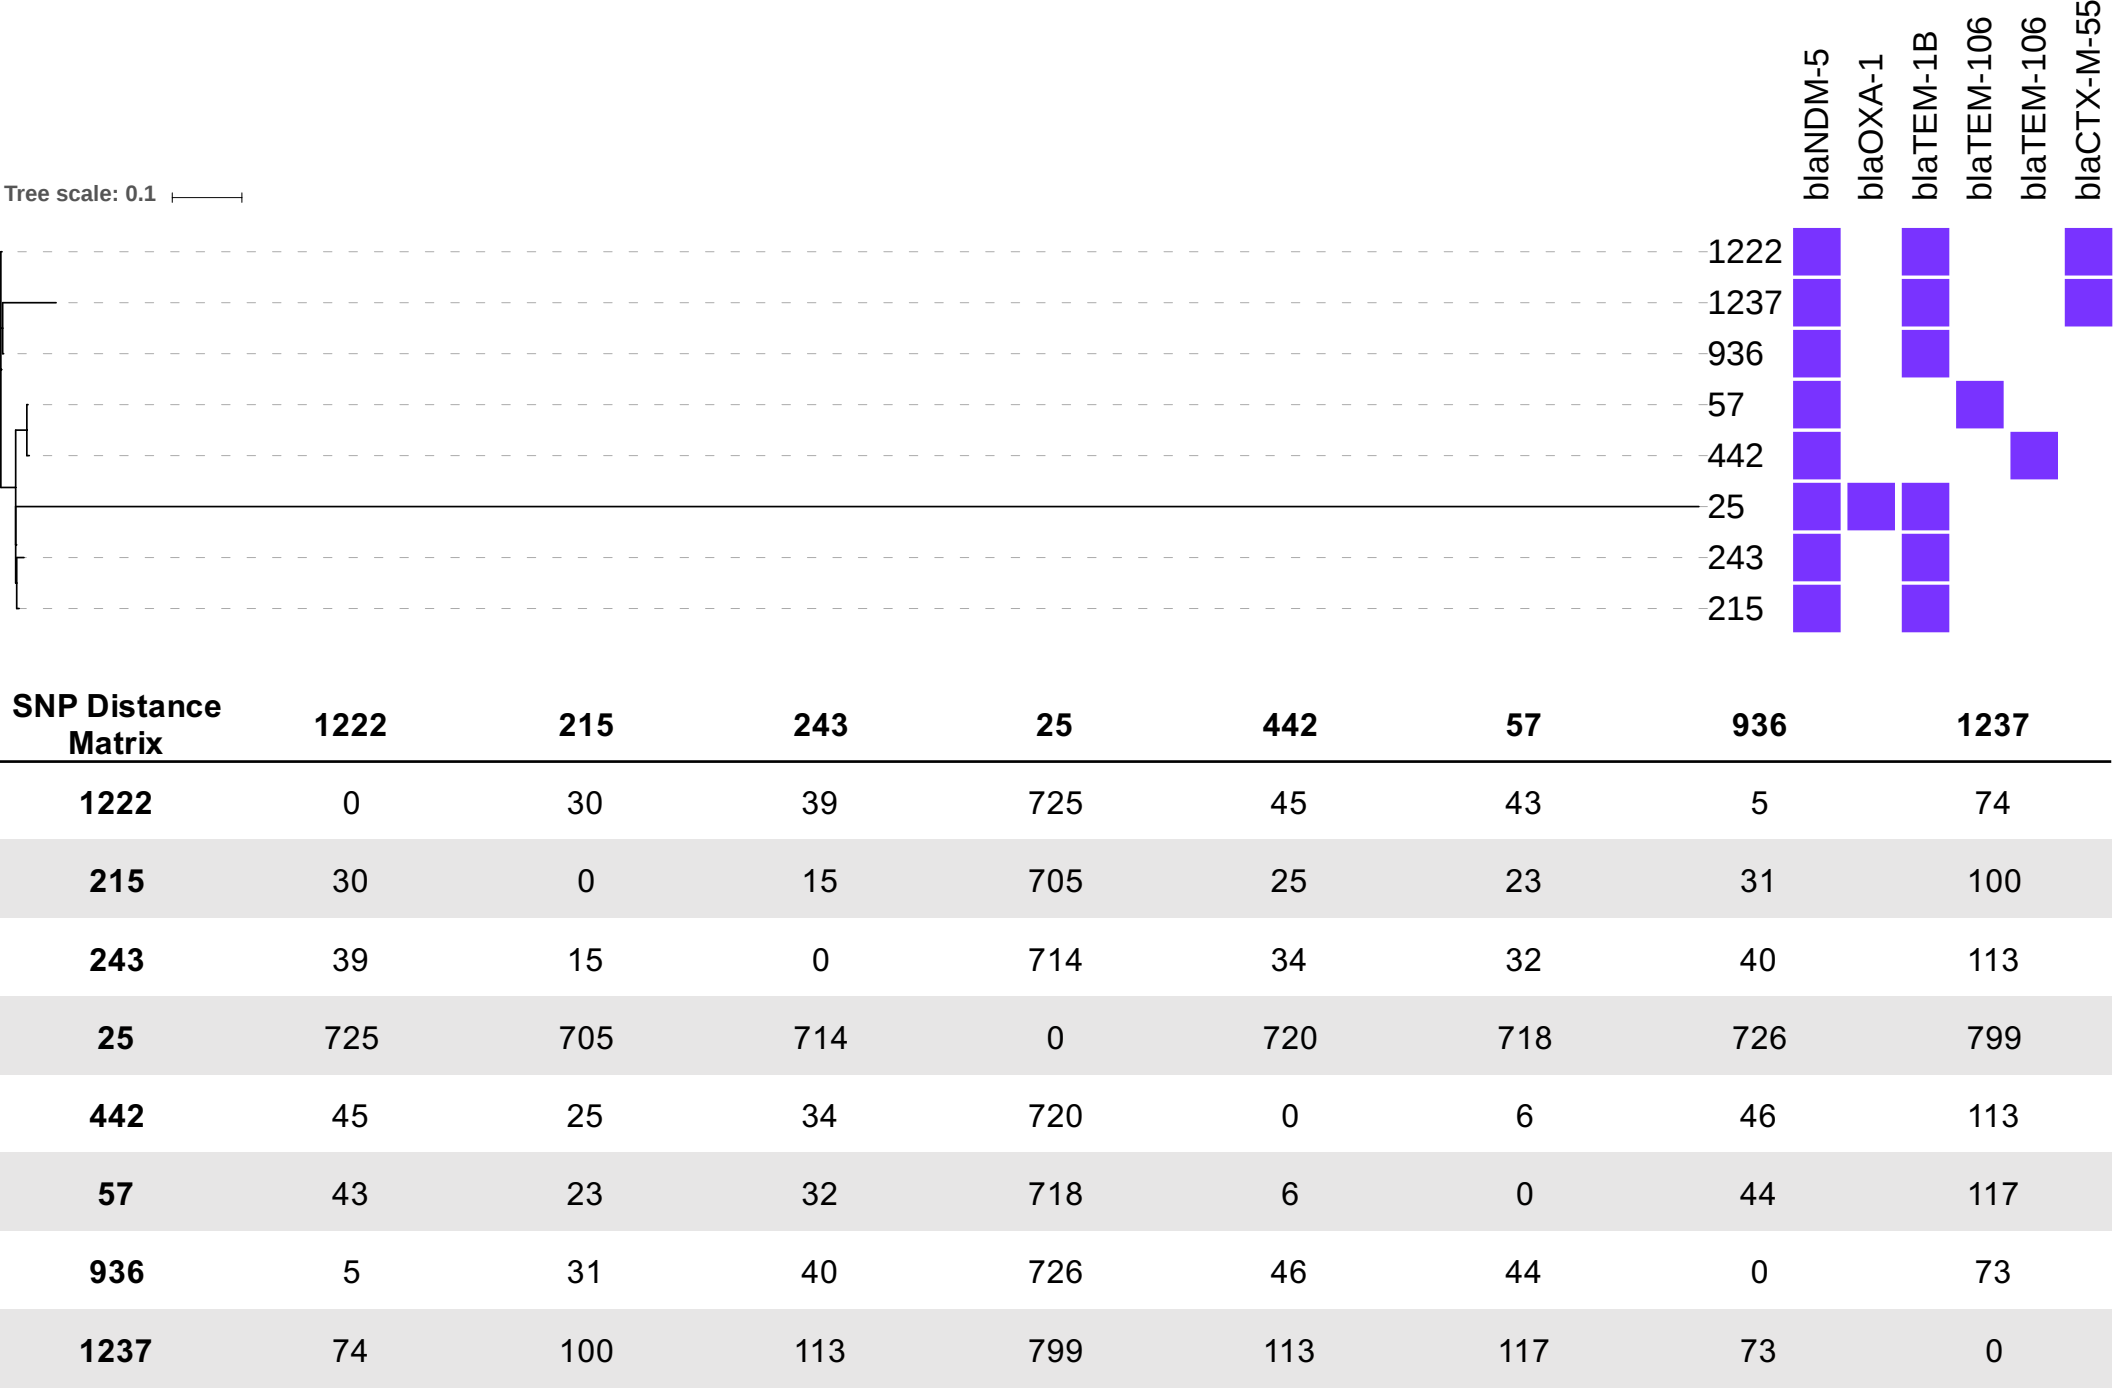



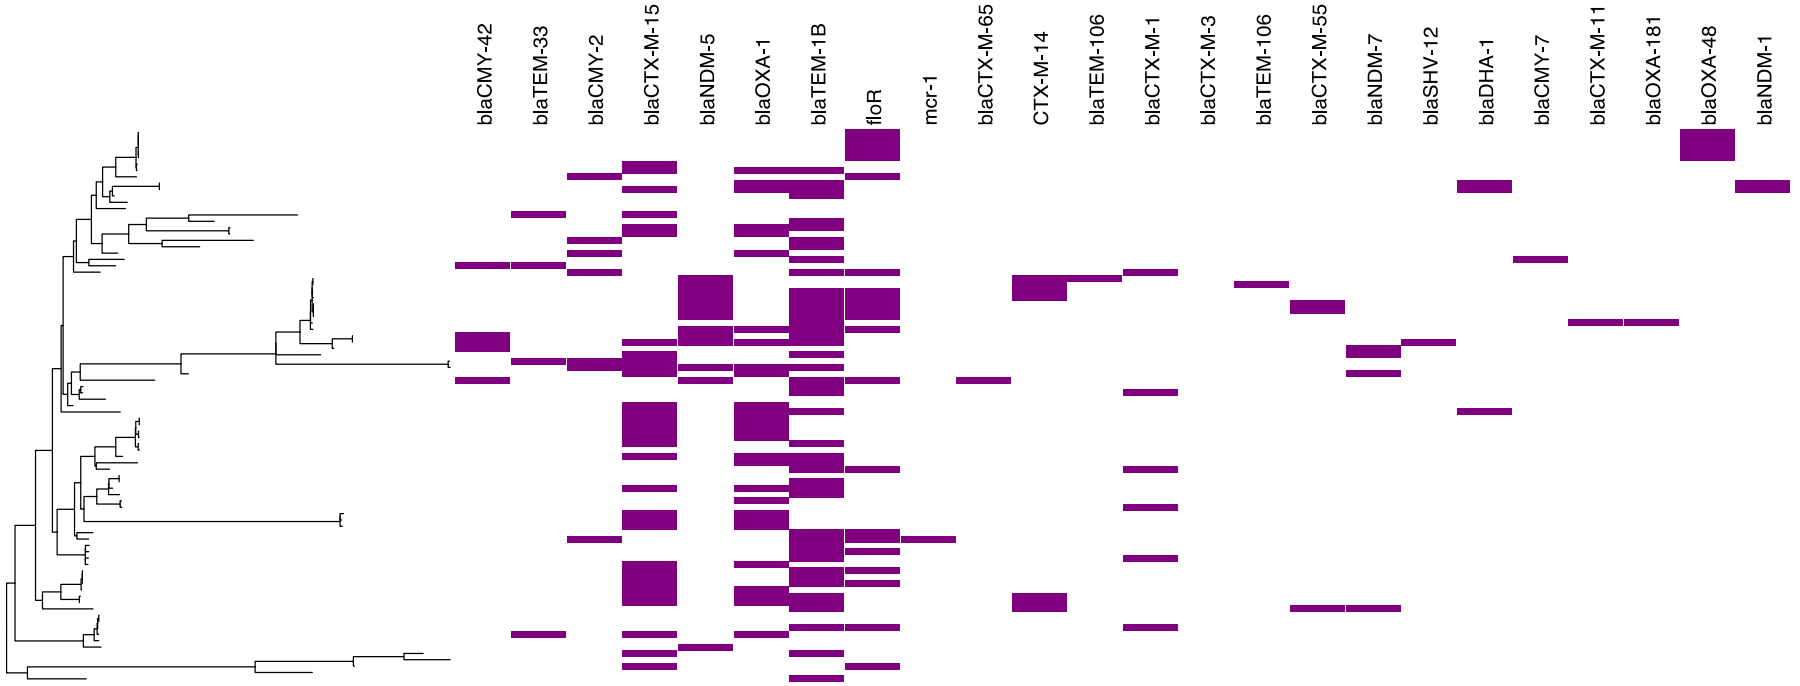

**B**

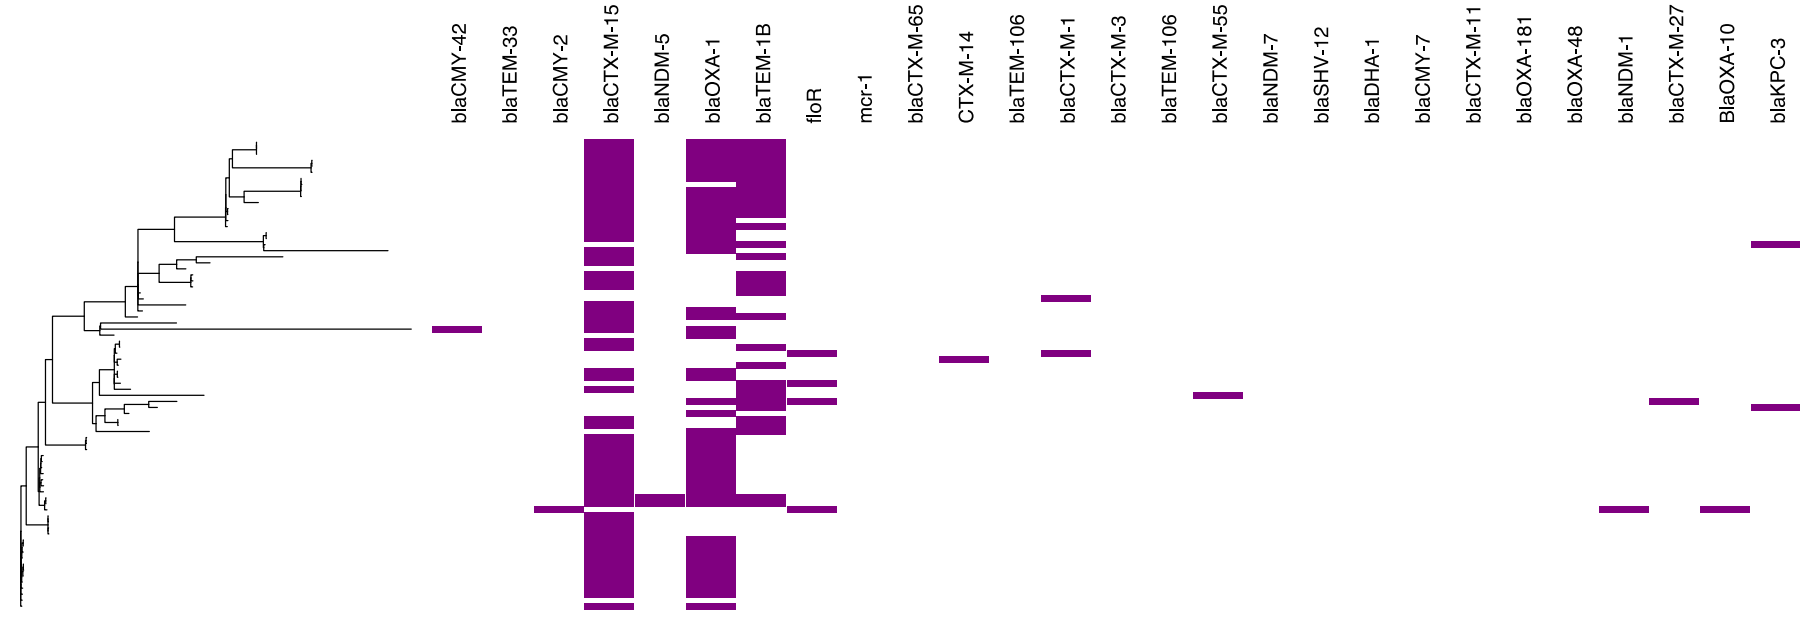

**A**



O Antigen (inner colour band)

- O32novel
- Other

H Antigen (outer colour band)

- No Antigen
- H9
- H10
- Other

Beta-Lactam Resistance Genes

- Gene Present

- blaCMY-42
- blaCMY-2
- blaNDM-7
- blaNDM-5
- blaNDM-1
- blaSHV-12
- blaTEM-116
- blaTEM-33
- blaTEM-1c
- blaTEM-1b
- blaTEM-1a
- blaOXA-48
- blaOXA-1
- blaCTX-M-55
- blaCTX-M-27
- blaCTX-M-15
- blaCTX-M-14
- blaCTX-M-1

bioRxiv preprint doi: <https://doi.org/10.1101/100941>; this version posted January 10, 2018. The copyright holder for this preprint (which was not certified by peer review) is the author/funder, who has granted bioRxiv a license to display the preprint in perpetuity. It is made available under aCC-BY 4.0 International license.

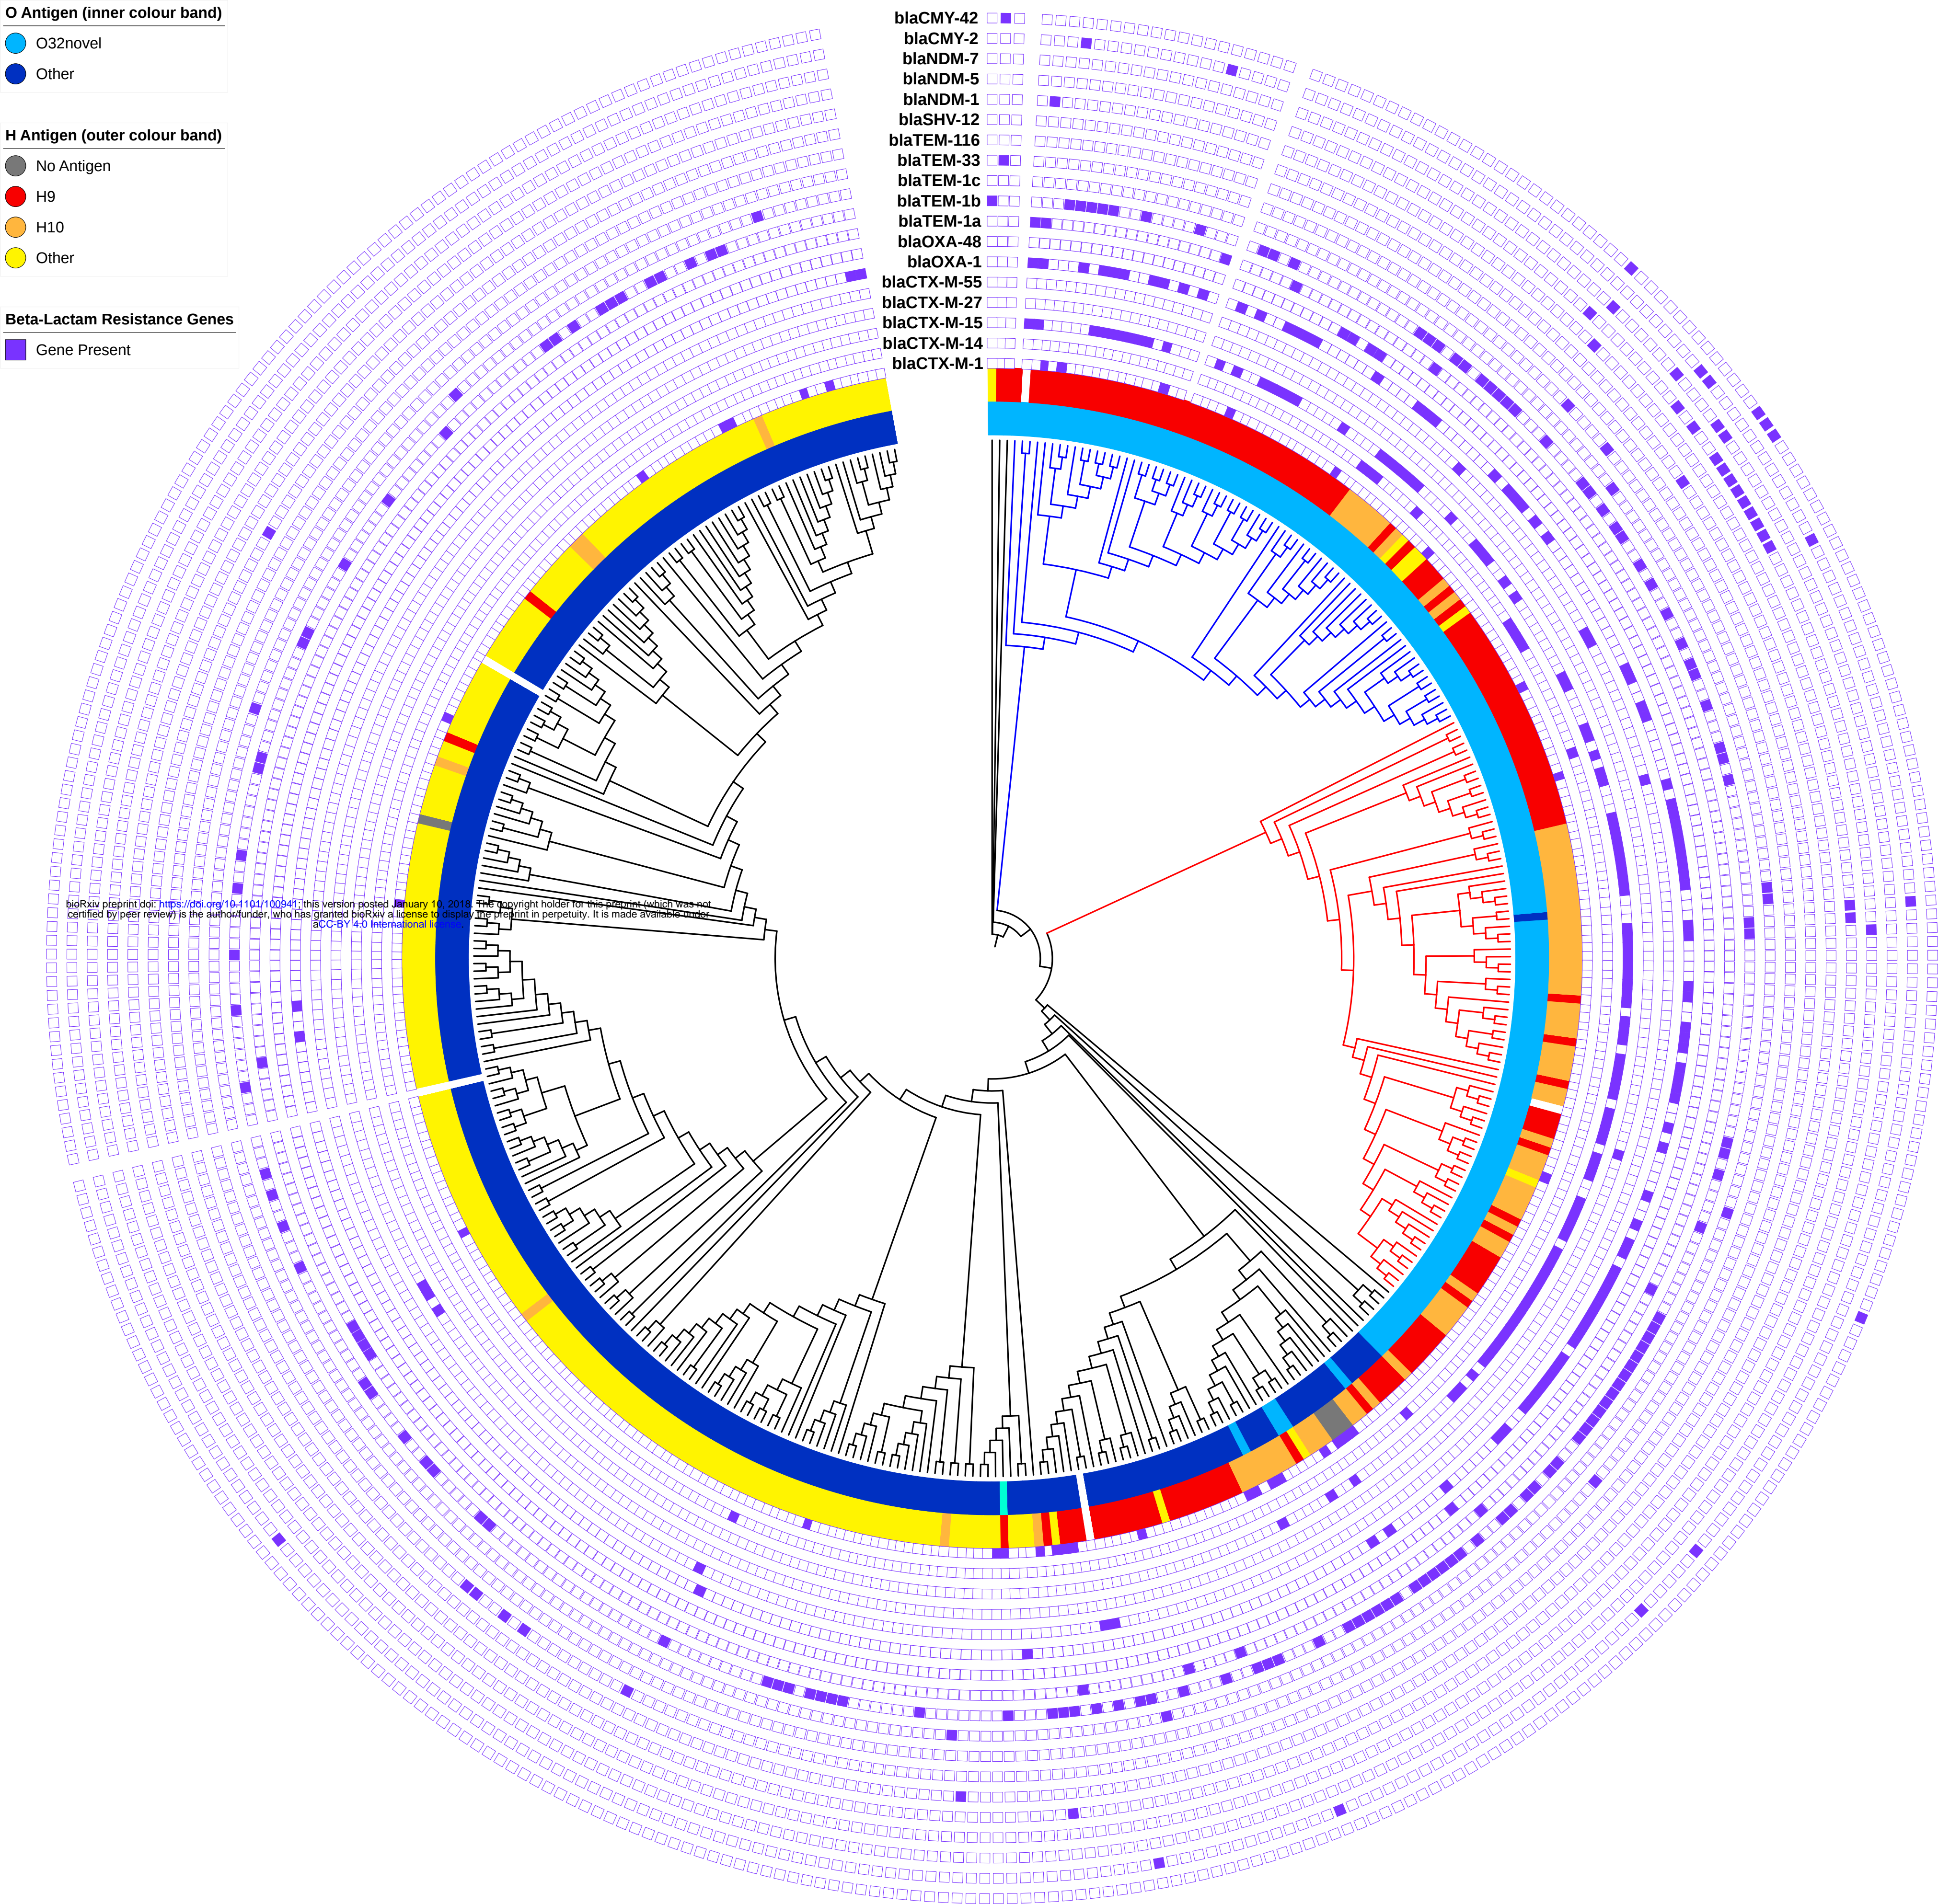



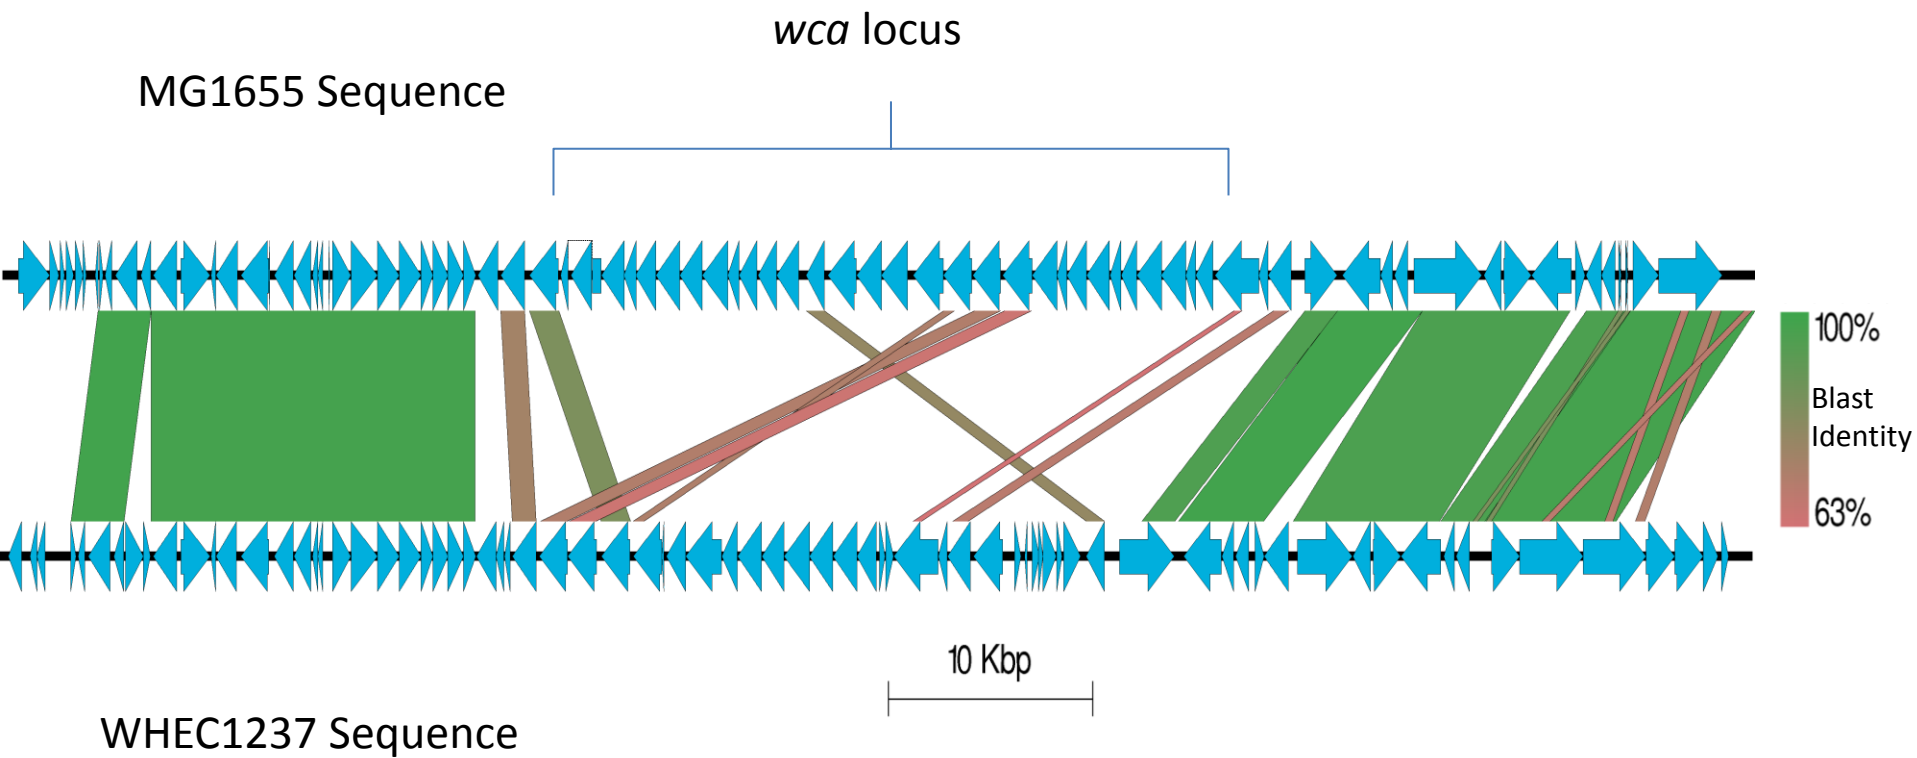

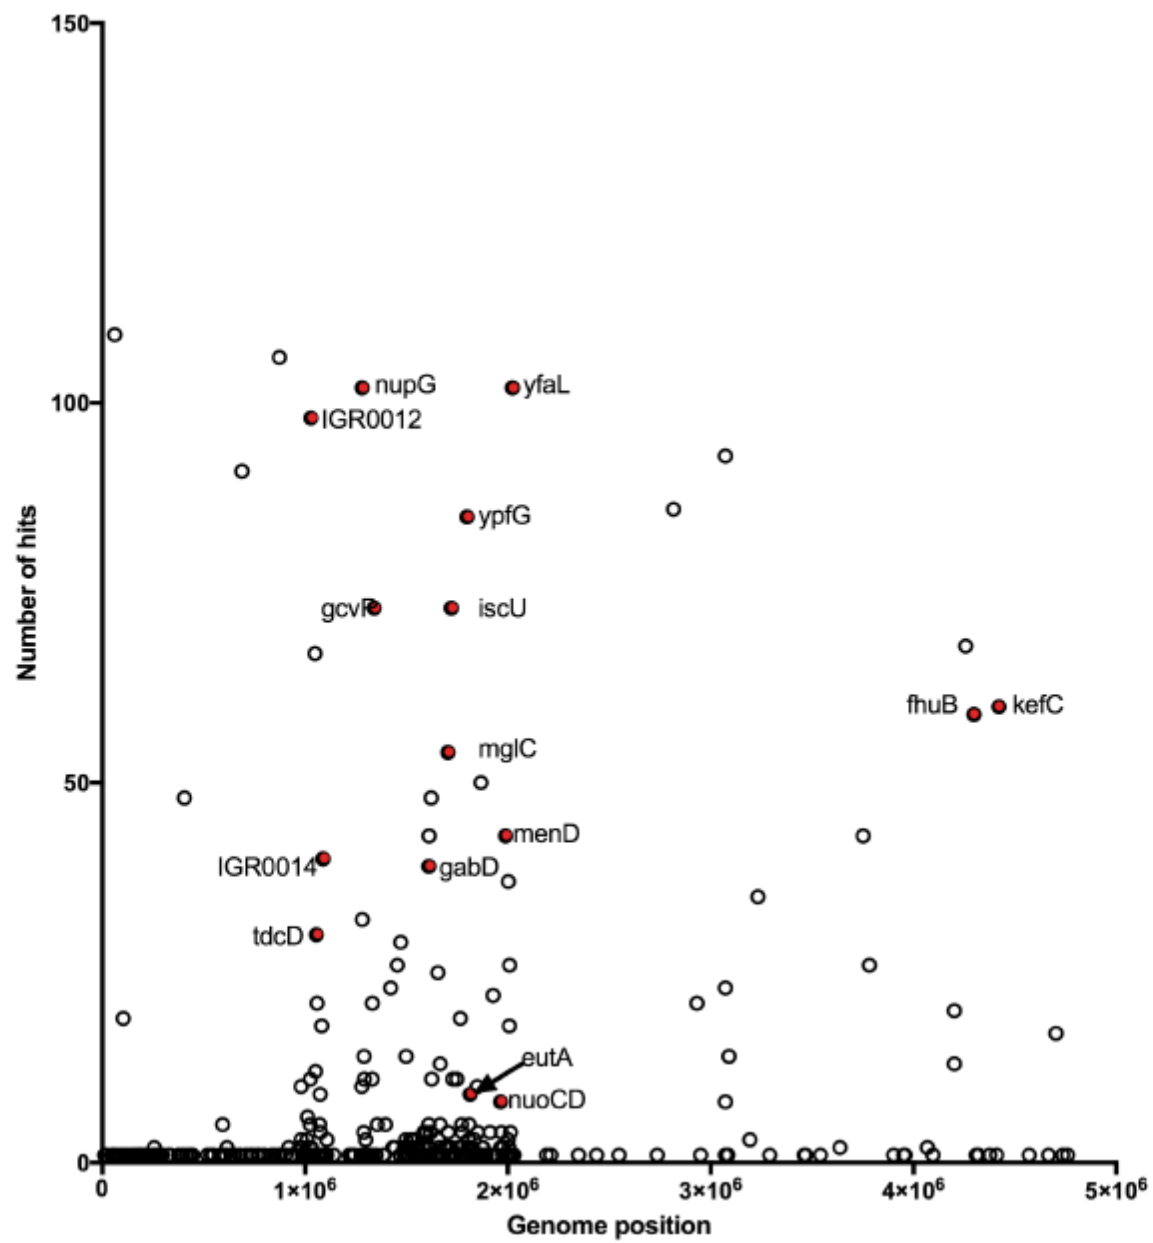

Source: https://www.biorxiv.org/content/10.1101/100941v2.full.pdf
